# Supplementary material for: Impacts of snow assimilation on seasonal snow and meteorological forecasts for the Tibetan Plateau
Source: Copernicus journal article supplement (doi:10.5194/tc-2022-87), 2022-05-23
Supplement: Supplementary file 1 [file tc-2022-87-supplement.pdf]

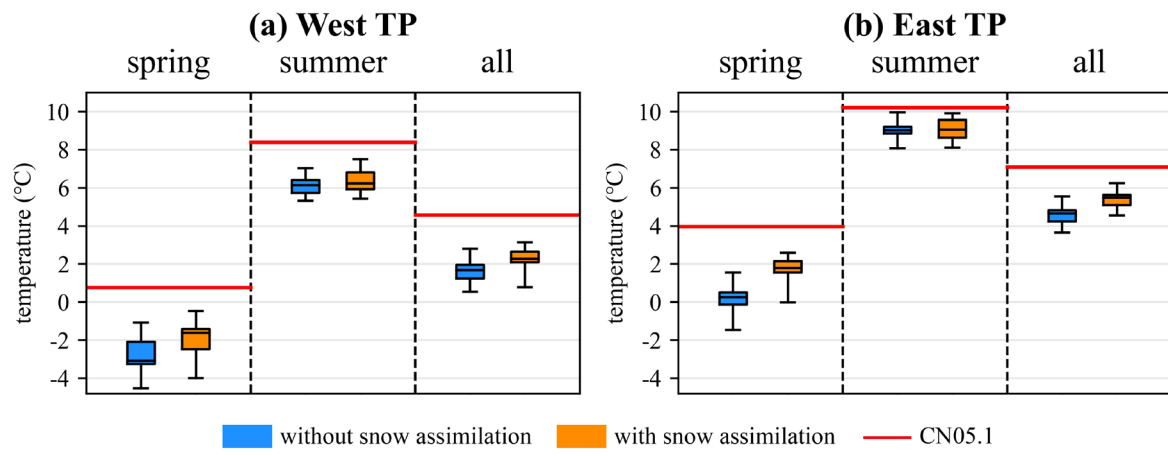

**Figure S1.** The daily averaged temperature of the two ensemble reforecasts and CN05.1 data in the (a) west Tibetan Plateau and (b) east Tibetan Plateau.

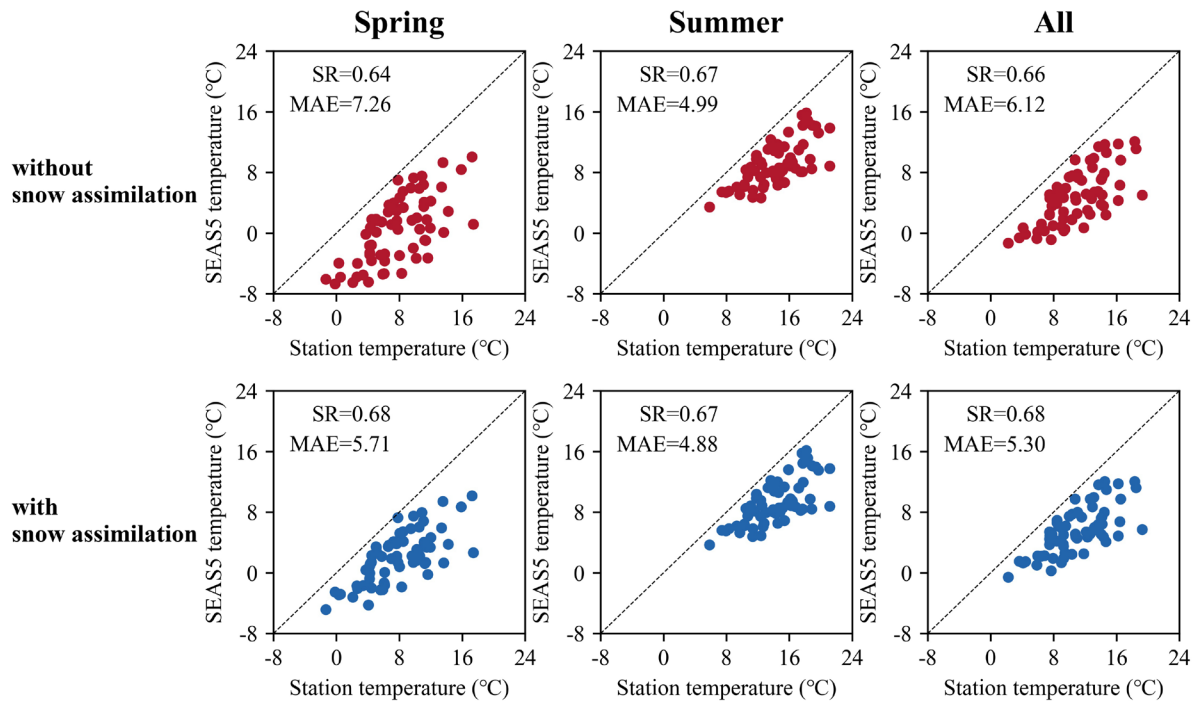

**Figure S2. The spatial correlations and mean error between the temperature reforecasts and in-situ observations.**

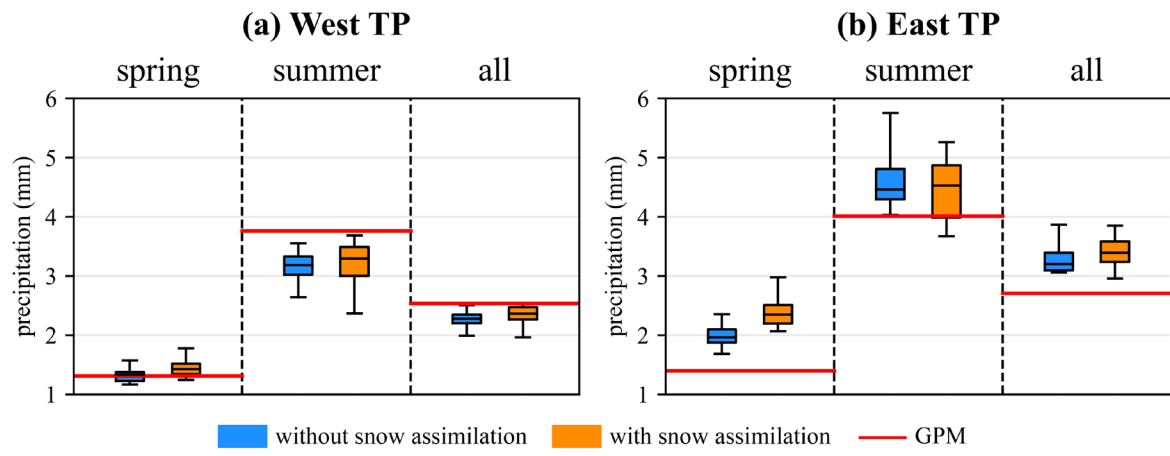

**Figure S3.** The daily averaged precipitation of the two ensemble reforecasts and GPM data in the (a) west Tibetan Plateau and (b) east Tibetan Plateau.

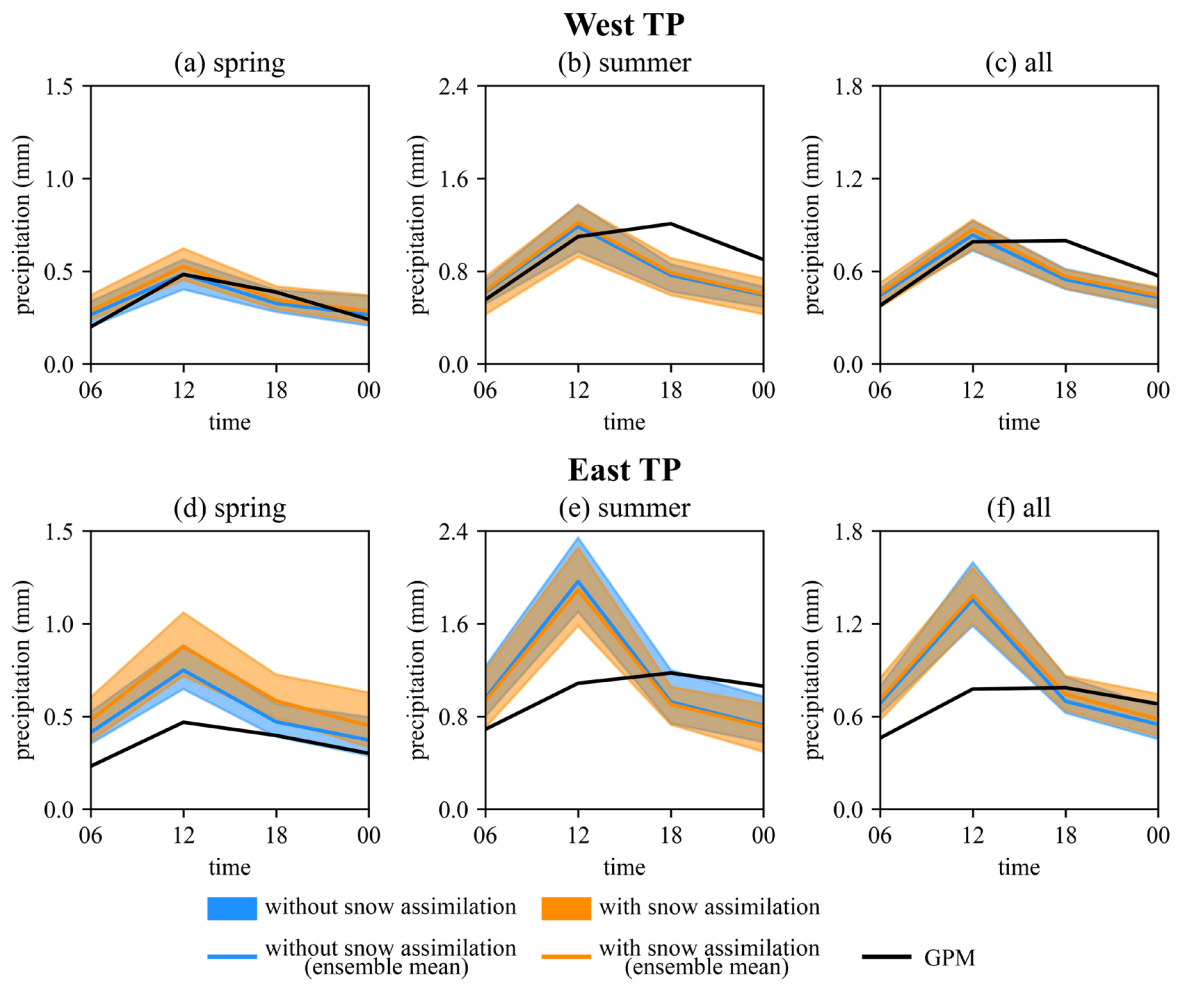

**Figure S4. The precipitation diurnal cycles for the two ensemble reforecasts and GPM data.**

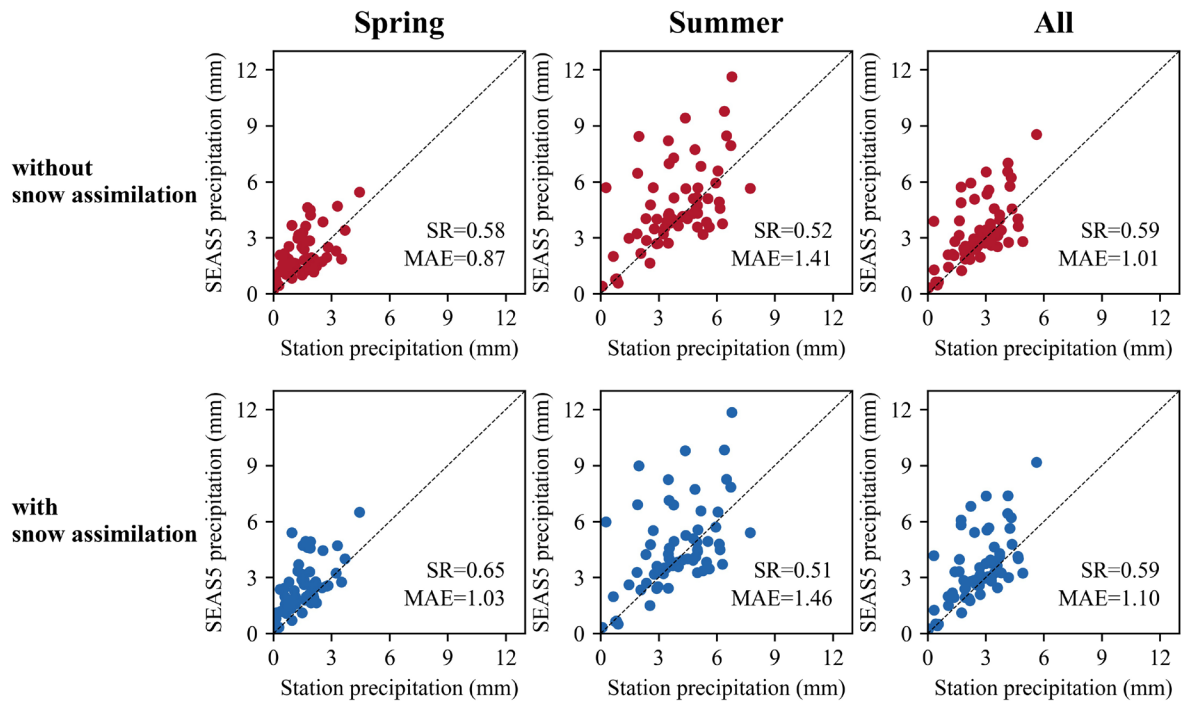

Figure S5. The spatial correlations and mean error between the precipitation reforecasts and in-situ observations.
